# Supplementary material for: Characterization of a Panel of Cross-Reactive Hantavirus Nucleocapsid Protein-Specific Monoclonal Antibodies
Source: MDPI journal article supplement (doi:10.3390/v15020532), 2023-02-14
Supplement: s1 [file s1]

**Table S1.** Oligonucleotides used in this work.

| Primer name | Primer sequence 5' to 3'                     | Restriction endonuclease |
|-------------|----------------------------------------------|--------------------------|
| DOBV_F      | TG <u>CTCGAGACAAT</u> GAGTGACTTGACAGACATTC   | XhoI                     |
| DOBV_R      | AG <u>CTCGAGA</u> AAGCTTAAGCGGCTCCTGATTAG    | XhoI                     |
| DOBV_N120_R | AG <u>CTCGAGT</u> AGCCAGTCTGCAGTTTGCCCTG     | XhoI                     |
| TULV_F      | TG <u>TCTAGAACAAT</u> GAGCCAACTCAAAGAAATAC   | XbaI                     |
| TULV_R      | AG <u>TCTAGATT</u> AGATTTTATAGCGGTTCCCTG     | XbaI                     |
| TULV_N120_R | AG <u>TCTAGATT</u> AAAACCAATCTGCTGTCTGTC     | XbaI                     |
| TPMV_F      | TG <u>TCTAGAACAAT</u> GACTCAAGGGAAAATGAC     | XbaI                     |
| TPMV_R      | AG <u>TCTAGATT</u> ACAGTTTAATAGGCTCCTGACTTG  | XbaI                     |
| TPMV_N120_R | AG <u>TCTAGATT</u> ATTCTAGGCTGAGTGGATTGAG    | XbaI                     |
| TSWV_F      | TG <u>TCTAGAACAAT</u> GTCTAAGGTAAAGCTCACTAAG | XbaI                     |
| TSWV_R      | AG <u>TCTAGATT</u> AAGCAAGTTCTGCGAGTTTGTG    | XbaI                     |

XhoI and XbaI restriction endonuclease recognition sites are underlined; start and termination codons are shown in bold. Primers were synthesized by Metabion International AG (Planegg, Germany) and Invitrogen (Glasgow, UK).

**Table S2.** List of constructed plasmids for the synthesis of entire and truncated N proteins of *Dobrava-Belgrade virus* (DOBV), *Tula virus* (TULV) and *Thottapalayam virus* (TPMV) in *E. coli*.

| Primers used for cloning | Plasmid used for the construction | Constructed plasmids | Synthesized protein |
|--------------------------|-----------------------------------|----------------------|---------------------|
| DOBV_F, DOBV_R           | pET28a <sup>+</sup>               | pET28_DOBV_N         | DOBV N              |
| DOBV_F, DOBV_N120_R      |                                   | pET28_DOBV_N120      | DOBV N120           |
| TULV_F, TULV_R           |                                   | pET28_TULV_N         | TULV N              |
| TULV_F, TULV_N120_R      |                                   | pET28_TULV_N120      | TULV N120           |
| TPMV_F, TPMV_R           |                                   | pET28_TPMV_N         | TPMV N              |
| TPMV_F, TPMV_N120_R      |                                   | pET28_TPMV_N120      | TPMV N120           |

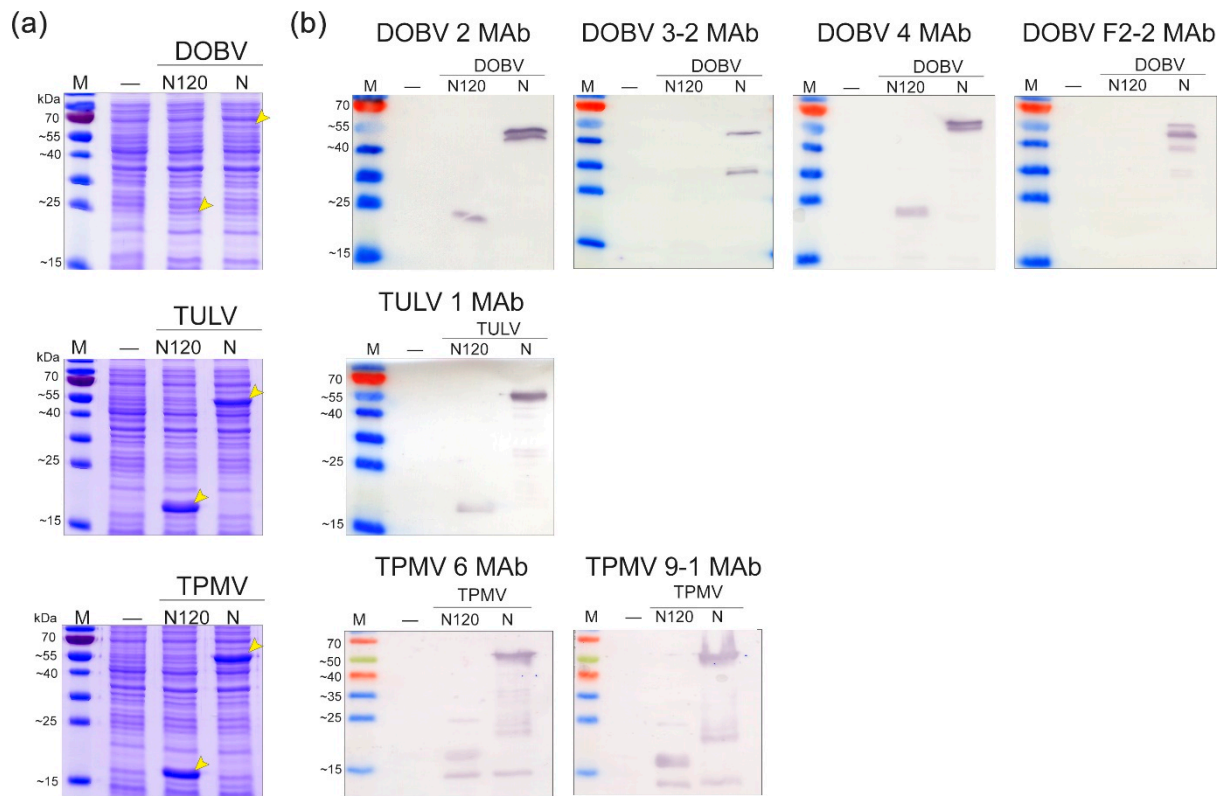

**Figure S1.** Epitope mapping of hantavirus-specific MAbs. **(a)** SDS-PAGE analysis of *E. coli* cell lysates expressing recombinant N proteins of DOBV, TULV and TPMV. “—” shows the lysate of bacteria that do not express a recombinant protein which was used as a negative control; “N” refers to the full-length hantavirus N proteins; “N120” refers to the truncated 120 aa-long proteins. Yellow arrows show bacteria-expressed truncated N120 and full-length proteins in cell lysate samples. **(b)** Reactivity patterns of hantavirus-specific MAbs with full-length and truncated N proteins of DOBV, TULV and TPMV in Western blot assay.

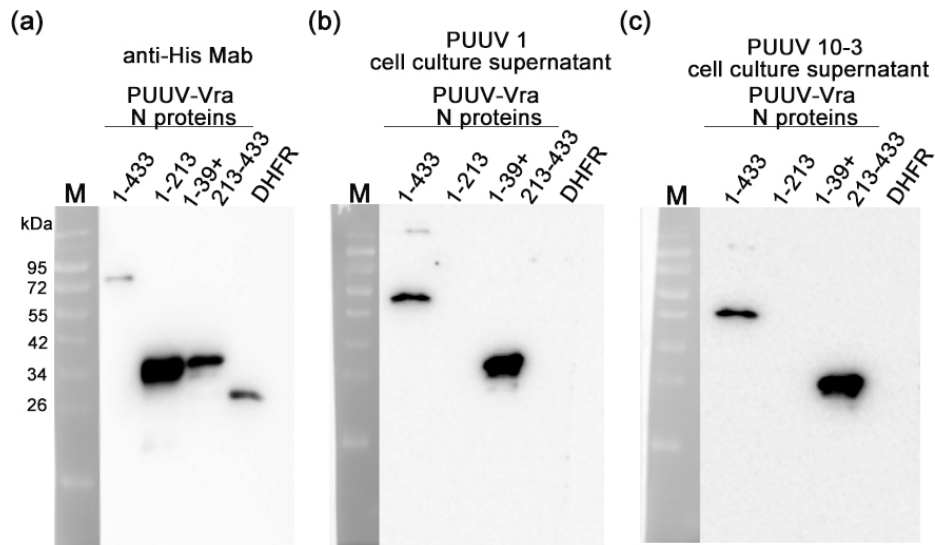

**Figure S2.** Western blot analyses of *E. coli*-produced N protein derivatives of PUUV strain Vranica/Hällnäs with **(a)** anti-His MAb, **(b)** MAb PUUV 1 and **(c)** MAb PUUV 10-3 cell culture supernatants. The numbers above each row indicate full-length (aa 1-433) and truncated N proteins (aa 1-213, aa 1-39+213-433) of *Puumala orthohantavirus*, strain Vranica/Hällnäs (PUUV-Vra). Mouse dihydrofolate reductase (DHFR) expressed in the same pQE-vector-based *E. coli* system and purified by the same affinity chromatography was used as negative control.

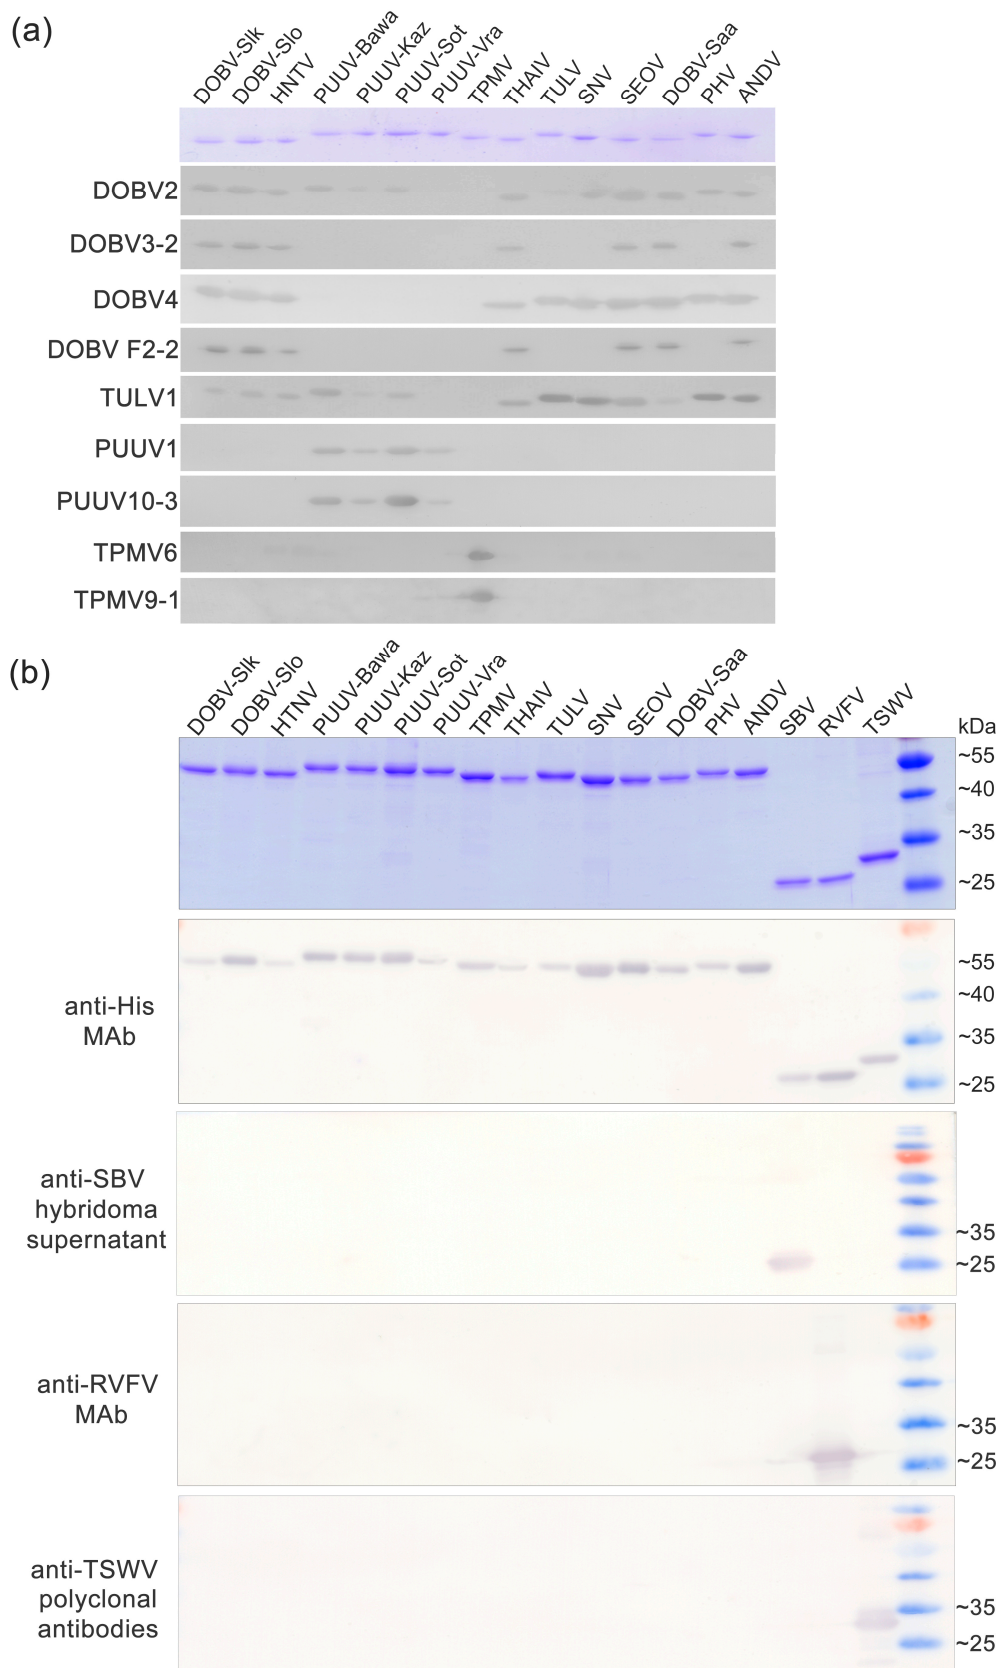

**Figure S3.** Reactivities of DOBV-, TULV-, TPMV- and PUUV-specific MABs **(a)** and of control antibodies **(b)** in Western blot assays with hantavirus N proteins and N proteins of other bunyaviruses. A part of SDS-PAGE with fractionated hantavirus N proteins is shown in the first row of panels a and b (in blue color). The rows shown below demonstrate the reactivity of hantavirus-specific MABs (a) and control antibodies raised against His-tag, SBV, RVFV or TSWV (b). The antibodies used are specified on the left of each row. *Dobrava-Belgrade*

*orthohantavirus*, genotype Kurkino, strain Slovakia (DOBV-Slk), genotype Dobrava, strain Slovenia (DOBV-Slo); *Hantaan orthohantavirus* (HTNV); *Puumala orthohantavirus*, strains Bavaria (PUUV-Bawa), Kazan (PUUV-Kaz), Sotkamo (PUUV-Sot), Vranica/Hällnäs (PUUV-Vra); *Thottapalayam thottimvirus* (TPMV); *Thailand orthohantavirus* (THAIV); *Tula orthohantavirus* (TULV); *Sin Nombre orthohantavirus* (SNV); *Seoul orthohantavirus* (SEOV); *Dobrava-Belgrade orthohantavirus*, genotype Saaremaa (DOBV-Saa); *Prospect Hill orthohantavirus* (PHV); *Andes orthohantavirus* (ANDV). Lower molecular weight having N proteins of *Schmallenberg orthobunyavirus* (SBV) (27 kDa), *Rift valley fever phlebovirus* (RVFV) (28.5 kDa) and *Tomato spotted wilt tospovirus* (TSWV) (29.7 kDa) used as negative controls are not shown in panel (a).
